# Supplementary material for: Use of urinary 13,14, dihydro-15-keto-prostaglandin F2α (PGFM) concentrations to diagnose pregnancy and predict parturition in the giant panda (Ailuropoda melanolecua)
Source: PubMed Central journal article supplement (PMC5931454; doi:10.1371/journal.pone.0195599), 2018-05-02
Supplement: pone.0195599.s001.pdf [file pone.0195599.s001.pdf]

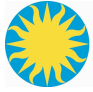

Smithsonian Conservation Biology Institute  
*Center for Species Survival*

19 September 2017

Dr. Joerg Heber  
Editor-in-Chief, *PLoS One*  
Public Library of Science  
1160 Battery Street  
Koshland Building East, Suite 225  
San Francisco, CA 94111, USA

Dear Sir:

I am writing this letter in support of Beth Robert's study on PGFM in giant pandas during pregnant and pseudopregnant cycles, and to corroborate an unpublished citation in her paper that we have conducted ultrasound on our female, and that at least once, we were unable to locate a fetus, even when completed in the days leading up to what was a successful birth. Thus, ultrasonography is not a fool-proof method to diagnose pregnancy in this species, as it requires specialized equipment, highly trained ultrasonographer, and probably more importantly, the female being in a proper position to scan the entire reproductive tract. False negative results are not uncommon.

Sincerely,

Janine Brown, PhD  
Research Physiologist/Endocrine Laboratory Head
